# Supplementary material
Source: PubMed Central journal article supplement (PMC4049286)
Supplement: NIHMS562064-supplement-303411R1_Online_Data_Supplement.pdf [file NIHMS562064-supplement-303411R1_Online_Data_Supplement.pdf]

## Supplemental Material

### Supplemental Methods

**Mouse breeding and genotyping.** YAP flox mice were generated as previously described in details <sup>1</sup>. SM22 $\alpha$ -Cre mice were purchased from the Jackson Laboratory <sup>2</sup>. To generate mice in which the cre transgene induces a smooth muscle cell-specific knockout of YAP, we first generated SM22 $\alpha$ -Cre<sup>+</sup>/YAP<sup>F/W</sup> mouse, by crossing SM22 $\alpha$ -Cre<sup>+</sup> male mice with YAP<sup>F/F</sup> female mice. Then SM22 $\alpha$ -Cre<sup>+</sup>/YAP<sup>F/W</sup> male mice were used to breed with YAP<sup>F/F</sup> female mice to achieve cardiac/smooth muscle-specific YAP deletion. This breeding strategy yielded 25% progeny with the homozygous smooth muscle specific deletion (SM22 $\alpha$ -Cre<sup>+</sup>/YAP<sup>F/F</sup>) and 25% SM22 $\alpha$ -Cre<sup>-</sup>/YAP<sup>F/F</sup> as control littermates (Online Table I). Embryonic day (E) 0.5 was defined as noon of the day when the vaginal plug was detected. Genotyping of these mice was performed as previously described (Online Figure I A) <sup>1,2</sup>. The use of experimental animals has been approved by the IACUC at Georgia Regents University and Albany Medical College in accordance with NIH guidelines.

**Sections, Hematoxylin/Eosin (HE) staining, immunofluorescence (IF) and immunohistochemistry (IHC).** Embryos or neonatal pups were euthanized by decapitation, fixed with 4% paraformaldehyde over-night at 4°C and embedded in paraffin. Histological assays were performed as described in our previous report <sup>3,4</sup>. Briefly, sections were cut at 7- $\mu$ m thickness, deparaffinized and antigen retrieval was done by using microwave to heat at 98°C for 5 minutes in citric acid buffer (10mM, pH6.0). After goat serum (10%, Invitrogen) blocking for 30 minutes, sections were then incubated with anti SM  $\alpha$ -actin (Sigma, mouse, 1:600), anti MF20 (Developmental Studies Hybridoma Bank, mouse, 1:50), anti Ki-67 (Thermo Scientific,

rabbit, 1:30), anti SM MHC (Biomedical Technologies Inc, rabbit 1:30), or anti-phospho-histone H3 (PH3) (Millipore, rabbit, 1:50) antibodies. For IF, the sections were stained with secondary antibody (488nm anti-rabbit secondary antibody or 647nm anti-mouse secondary antibody, 1:250 dilution, Invitrogen) diluted in blocking buffer for 1 hour at room temperature. Sections were then immersed with mounting medium (ProLong Gold antifade reagent with DAPI, Invitrogen) to visualize nuclei. Sections stained with IF were imaged using confocal microscopy (LS510 meta, Zeiss). The fluorescence intensity was quantified by Image J software. For IHC, sections were stained using the Vectastain Elite ABC Kit (Vector Laboratories) by using anti YAP antibody (Cell Signaling, rabbit, 1:30) as described in our recent report <sup>4</sup>. HE staining was performed following standard protocol as previously described <sup>3, 4</sup>. HE staining images were acquired using an Olympus BX51 inverted microscope. The thickness of myocardium wall, arterial wall and arterial lumen area was measured by Image J software.

**Preparation of primary aortic SMCs from adult rat or mouse embryos.** Rat arterial tissues were harvested and primary rat aortic SMCs were prepared and cultured as described in our previous reports <sup>3-5</sup>. For preparation mouse embryonic vascular SMCs, dorsal aorta from mouse E15.5 embryos was dissected and isolated. After removing periadventitial tissues under dissecting microscope, the aorta was then minced into small pieces and placed as explants under glass cover-slips in 24-well plate containing 10% FBS DMEM medium. After 5-7 days, SMCs that migrated out from the aortic explants were trypsinized and replated into 6-well plate. Staining with SM MHC antibody confirmed >99% SMC purity (Online Figure VI). SMCs were used for experiments from passage 3 to passage 6.

**siRNA transfection.** Scrambled control siRNA and siRNA targeting mouse and rat Gpr132 (ON-TARGETplus SMARTpool) were purchased from Thermo Scientific. Delivery siRNA into rat

primary aortic SMCs and mouse embryonic aortic SMCs was done using Neon transfection system (Invitrogen) essentially following the manufacturer's protocol and as described in our previous report <sup>3</sup>. After electroporation for 24 hours cells were equally plated for BrdU incorporation assays or counted at each time point as indicated in figures. After electroporation 48 hours cells were harvested to extract total RNA for qRT-PCR to validate the knock-down efficacy.

**BrdU incorporation assay.** Dorsal aortic SMCs were prepared from E15.5 control or mutant embryos and grown (passage 4) on coverslips. After 16 hours serum starvation cells were treated with 10uM BrdU (5-bromodeoxyuridine, Sigma) for 16 hours. Subsequently cells were then fixed, permeabilized by using Triton X-100, and incubated with monoclonal anti BrdU antibody (Sigma, mouse, 1:200), followed by incubation with 647nm anti-mouse secondary antibody (1:250) (Molecular Probes). Cells were then immersed in ProLong Gold mounting medium with DAPI (Invitrogen) to visualize nuclei. BrdU incorporation assay in rat aortic primary SMCs (passage 6) was performed as described as above except cells were heated at 98°C for 5 minutes in citric acid buffer for antigen retrieval to replace Triton X-100 permeabilization. Images were obtained using a Zeiss Axio Observer Z1 inverted microscope at 20x magnification. For SMC counting, SMCs were seeded in 12-well plate in triplicates at equal density and then cell numbers were manually counted at indicated days by a hemocytometer.

**Adenoviral construction and cell infection.** Adenovirus encoding Flag tagged YAP was generated as described previously <sup>4, 5</sup>. To generate mouse Gpr132 adenovirus, a cDNA clone encoding mouse Gpr132 was purchased from Thermo Scientific (Clone ID: 40129445) and subcloned into AdTrack shuttle vector by PCR with primers harboring KpnI and HindIII restriction enzyme sites (primer sequences were listed in the Online Table III). As this vector

contains an independent cytomegalovirus promoter-driven transcription cassette for green fluorescent protein (GFP) in addition of Gpr132, the efficiency of transduction can be directly monitored by visualization of GFP expression. Transferring the Gpr132 and GFP expression cassettes into AdEasy viral backbone, viral packaging and cell infection was performed as we previously reported<sup>3,5</sup>.

**Cell cycle analysis by flow cytometry.** Rat aortic SMCs were transduced with control GFP adenovirus or adenovirus co-expressing Gpr132 and GFP for 48 hours. Cells were then harvested and washed with phosphate-buffered saline and fixed overnight with 70% ice-cold ethanol at -20 °C. The fixed cells were stained with a solution containing propidium iodide (25 µg/ml) and then analyzed with a Becton Dickinson FACSAria II SORP cell sorter flow cytometer at the core facility. Only GFP positive cells in both control and over-expressing Gpr132 groups were gated for further cell cycle analysis. G<sub>0</sub>/G<sub>1</sub>, S and G<sub>2</sub>/M phases were assessed by fitting the cell distribution using Cell Quest and Modfit software (Becton Dickinson).

**Quantitative real time RT-PCR (qRT-PCR) analysis.** Total RNA from control or mutant embryo dorsal aorta tissues was extracted by RNeasy Micro Kit (Qiagen). Total RNA from rat primary aortic SMCs was isolated with TRIzol reagent. 0.5-1 µg of RNA was utilized as a template for RT with random hexamer primers using the High Capacity RNA-to-cDNA Kit (Invitrogen). PCR array was performed to screen cell cycle related gene expression profile using Cell Cycle PCR Array kit (SABiosciences, mouse) as described in our previous report<sup>5</sup>. qRT-PCR was performed with respective gene-specific primers as we previously reported otherwise were listed in Online Table III<sup>3-5</sup>. All samples were amplified in duplicate and every experiment was repeated independently 2 times. Relative gene expression was converted using the  $2^{-\Delta\Delta Ct}$

method against the internal control acidic ribosomal phosphoprotein P0 (RPLP0) house-keeping gene for rat and hypoxanthine phosphor ribosyl transferase 1 (HPRT) for mouse.

**Co-immunoprecipitation.** Rat primary aortic SMCs were transduced with adenovirus encoding YAP. 48 hrs after transduction, nuclear protein was harvested for co-immunoprecipitation assays with anti-HDAC4 antibody (Millipore, rabbit) using Nuclear Complex Co-IP Kit (Active Motif) as described in our previous reports<sup>6,7</sup>. Western blot was performed using HDAC4, YAP, TEAD1 antibody as described below.

**Protein extraction and Western blotting.** Dorsal aortae were dissected from E15.5 control or mutant mouse embryos and periadventitia tissues were removed under a stereoscope. Tissues were cut into small pieces and ground with a glass homogenizer in RIPA buffer (Fisher) with 1% proteinase inhibitor cocktail (Pierce) and 1% PMSF. After sonication and centrifugation of the cell lysate, proteins were quantified by BCA assay and then loaded in a 6-9% SDS-PAGE gel at 5-10 µg per lane. Protein was extracted from retrovirus infected rat primary aortic SMCs as previously described<sup>3</sup>. Antibodies used in this study were: YAP (Sigma, mouse, 1:2000), SM  $\alpha$ -actin (Sigma, AC-74, 1:4000), calponin (Santa Cruz, N-15R, 1:1000), Hic-5 (BD, 1:5000), MLCK (Sigma, clone K36, 1:5000), Gpr132 (Proteintech, rabbit, 1:2000), Trp63 (Santa Cruz, 4A4, mouse, 1:1000), stratifin (Sfn, Millipore, AB9742, rabbit, 1:2000), PCNA (Santa Cruz, 1:500), cyclin D1 (Ccmd1, Cell signaling, #2926, 1:1000),  $\alpha$ -tubulin (Cell Signaling, 1:5000), GAPDH (Santa Cruz, 1:2000), TEAD1 (BD, 1:2000), HDAC4 (Millipore, 1:2000). Images were taken by ImageQuant LAS 4000 Imaging Station (GE) and band densities were quantified using the ImageQuant TL software (GE).

**Luciferase reporter assays.** Cloning of GPR132 promoter luciferase reporter and dual luciferase assay were performed as described in our recent report <sup>4</sup>. A 1453bp fragment spanning GPR132 first intron (mouse Chr12: 112,857,974 - 112,859,426) was amplified by PCR with primers harboring KpnI and XhoI restriction enzyme sites by using mouse genomic DNA as template (Promega) (primer sequences were listed in the Online Table III). The PCR product was first cloned into pSC-B blunt vector (Stratagene) then subcloned into pGL2-Enhancer (Promega) luciferase reporter vector. A conserved MCAT element within GPR132 gene promoter was identified by a sequence alignment among mouse, rat and human (<http://genome.ucsc.edu>). Mutation of the MCAT element in the GPR132 promoter was carried out with QuickChange Site-Directed Mutagenesis kit (Stratagene). All plasmids were sequenced to verify the integrity of the insert. Mammalian expression plasmids for YAP and HDAC4 were generously provided by Dr. Kun-liang Guan, UCSD <sup>8</sup> and Dr. Stuart L. Schreiber at Harvard University <sup>9</sup>, respectively. Transfection was carried out with X-tremeGENE 9 transfection reagent (Roche) essentially following manufactory's protocol. The promoter activity was evaluated by measurement of the firefly luciferase activity relative to the internal control TK-renilla luciferase activity using the Dual Luciferase Assay System as described by the manufacturer (Promega). A minimum of six independent transfections was performed and all assays were replicated at least twice. Results are reported as the mean  $\pm$  SE.

**Quantitative Chromatin immunoprecipitation (ChIP) assays.** After infection with adenovirus expressing GFP or Flag-tagged YAP, rat primary aortic SMCs were fixed with formaldehyde, and ChIP was performed by using an anti-Flag (Sigma) or anti-HDAC4 (Millipore) antibody as described by the manufacturer (Active Motif) and in our previous report <sup>4, 6</sup>. Sequential ChIP with anti-HDAC4 antibody or IgG control was performed with anti-YAP antibody immunoprecipitated chromatin using Re-ChIP-IT kit (Active Motif). ChIP assay was repeated

twice and each assay was duplicated. Primers for quantitative evaluation of enrichment of the Gpr132 promoter MCAT region and exon 3 are listed in Online Table III.

**Statistical analysis.** Data are expressed as means  $\pm$  SE, and statistical analysis using unpaired t test was done with Prism software (Graphpad). Differences with p values  $< 0.05$  were considered significant.

## References

1. Zhang N, Bai H, David KK, Dong J, Zheng Y, Cai J, Giovannini M, Liu P, Anders RA, Pan D. The merlin/nf2 tumor suppressor functions through the yap oncoprotein to regulate tissue homeostasis in mammals. *Developmental cell*. 2010;19:27-38
2. Holtwick R, Gotthardt M, Skryabin B, Steinmetz M, Potthast R, Zetsche B, Hammer RE, Herz J, Kuhn M. Smooth muscle-selective deletion of guanylyl cyclase-a prevents the acute but not chronic effects of anp on blood pressure. *Proc Natl Acad Sci U S A*. 2002;99:7142-7147
3. Wang X, Hu G, Gao X, Wang Y, Zhang W, Harmon EY, Zhi X, Xu Z, Lennartz MR, Barroso M, Trebak M, Chen C, Zhou J. The induction of yes-associated protein expression after arterial injury is crucial for smooth muscle phenotypic modulation and neointima formation. *Arterioscler Thromb Vasc Biol*. 2012;32:2662-2669
4. Wang X, Hu G, Betts C, Harmon EY, Keller RS, Van De Water L, Zhou J. Transforming growth factor-beta1-induced transcript 1 protein, a novel marker for smooth muscle contractile phenotype, is regulated by serum response factor/myocardin protein. *J Biol Chem*. 2011;286:41589-41599
5. Wang X, Hu G, Zhou J. Repression of versican expression by microRNA-143. *J Biol Chem*. 2010;285:23241-23250
6. Zhou J, Hu G, Wang X. Repression of smooth muscle differentiation by a novel high mobility group box-containing protein, hmg2l1. *J Biol Chem*. 2010;285:23177-23185
7. Hu G, Wang X, Saunders DN, Henderson M, Russell AJ, Herring BP, Zhou J. Modulation of myocardin function by the ubiquitin e3 ligase ubr5. *J Biol Chem*. 2010;285:11800-11809



8. Zhao B, Ye X, Yu J, Li L, Li W, Li S, Lin JD, Wang CY, Chinnaiyan AM, Lai ZC, Guan KL. Tead mediates yap-dependent gene induction and growth control. *Genes & development*. 2008;22:1962-1971
9. Grozinger CM, Schreiber SL. Regulation of histone deacetylase 4 and 5 and transcriptional activity by 14-3-3-dependent cellular localization. *Proc Natl Acad Sci U S A*. 2000;97:7835-7840

## Online Figure Legends

**Online Figure I. Validation of targeted deletion of YAP.** **A.** Genomic DNA was extracted from yolk sacs of mouse E13.5 embryos and PCR was performed to detect YAP floxed allele and SM22 $\alpha$ -Cre transgene. F: Floxed; W: WT. **B.** IHC was performed by using anti-YAP antibody to determine YAP expression (brown) in the heart and descending aorta (De.A) from E15.5 control or KO embryo sections. Species-matched IgG served as a negative control. Nuclei were visualized by hematoxylin counter staining (blue). Note that thinning myocardium wall and descending aorta wall, and enlargement of arterial lumen in mutant embryos. RV: Right Ventricle; ES: esophagus. Scale bar: 100um. **C.** Western blotting was carried out to determine YAP expression in the heart from E13.5 control, heterozygote, or KO embryos. An arrow pointed to a non-specific band of YAP.

**Online Figure II. YAP mutant pups develop cyanosis.** Photograph of P0 control and cardiac/smooth muscle-specific YAP knock out (KO) pups as indicated (N=8). Shortly after birth mutant pups displayed blue coloration, an indicative of lack of oxygenated blood circulation.

**Online Figure III. YAP mutants exhibit severe hypoplastic myocardium.** **A-G.** HE staining of heart sections from control or YAP mutants of E11.5, E12.5, E13.5, E14.5, E15.5, E18.5 embryos and P0 neonates as indicated. Magnifications of right ventricle (RV) or left ventricle (LV) shown below each whole heart sections indicate drastic hypoplasia of compact myocardium in the mutants. Scale bar: 100um. **H.** The thickness of RV and LV myocardium wall at each time point as shown in “A-G” was quantified and presented relative to control (set to 1). N=5-6 embryos per genotype. \*p<0.05.

**Online Figure IV. YAP KO mutants display reduced proliferation of cardiomyocytes.** Heart sections from E11.5 control or mutant embryos were stained with proliferative marker Ki67 or mitosis marker phospho-histon H3 (PH3) (green), and cardiomyocyte marker MF20 (red). DAPI staining (blue) was utilized to visualize nuclei. Images were taken within right ventricle (RV) (**A**), left ventricle (LV) (**C**) and septum (**E**) area as indicated. The percentage of Ki67 or PH3 positive cardiomyocytes was plotted as shown along with representative staining photos (**B, D, F**). N=4 embryos per genotype. Scale bar: 50um \*p<0.05.

**Online Figure V. YAP mutants exhibit reduced SMC investment in arterial wall without affecting SM MHC expression.** **A.** Sections from E15.5 control or mutant left carotid artery were stained with smooth muscle-specific marker SM MHC (green) and counter-stained with DAPI (blue) to visualize nuclei. SM MHC positive cells were then counted and plotted (**B**). The average of SM MHC immuno-fluorescence intensity of each SMC was quantified by Image J software and presented in **C**. N=4 embryos per genotype. \*p<0.05.

**Online Figure VI. High purity SMCs cultured from embryonic dorsal aorta.** Primary aortic SMCs derived from E15.5 control or YAP mutant dorsal aorta were stained with smooth muscle-specific marker SM MHC (green) and counter-stained with DAPI (blue). More than 99% are SM MHC staining positive. Scale bar: 50um.

# Online Figure I

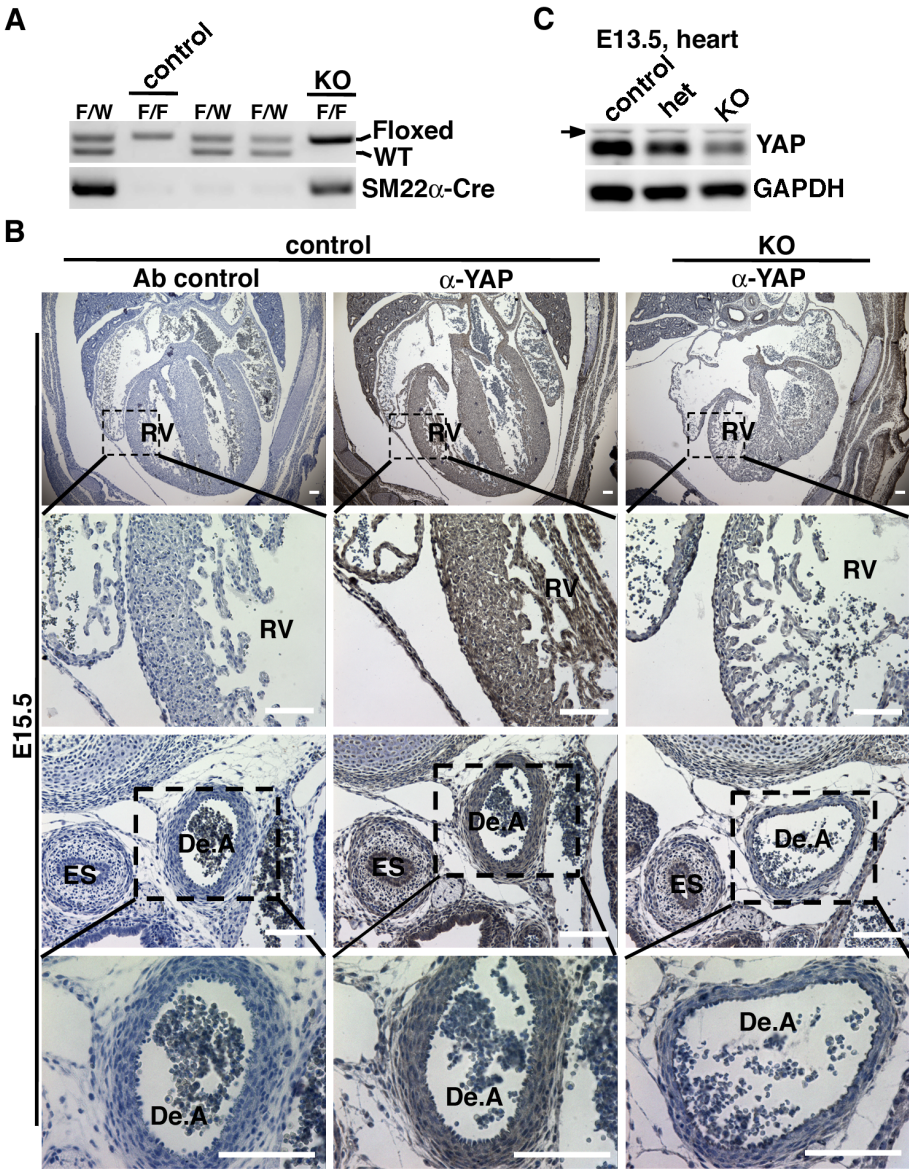

## Online Figure II

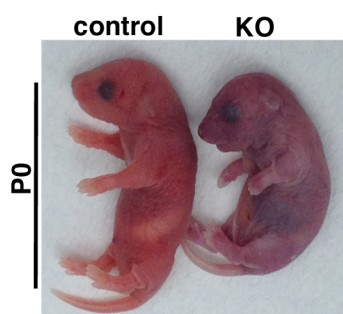

# Online Figure III

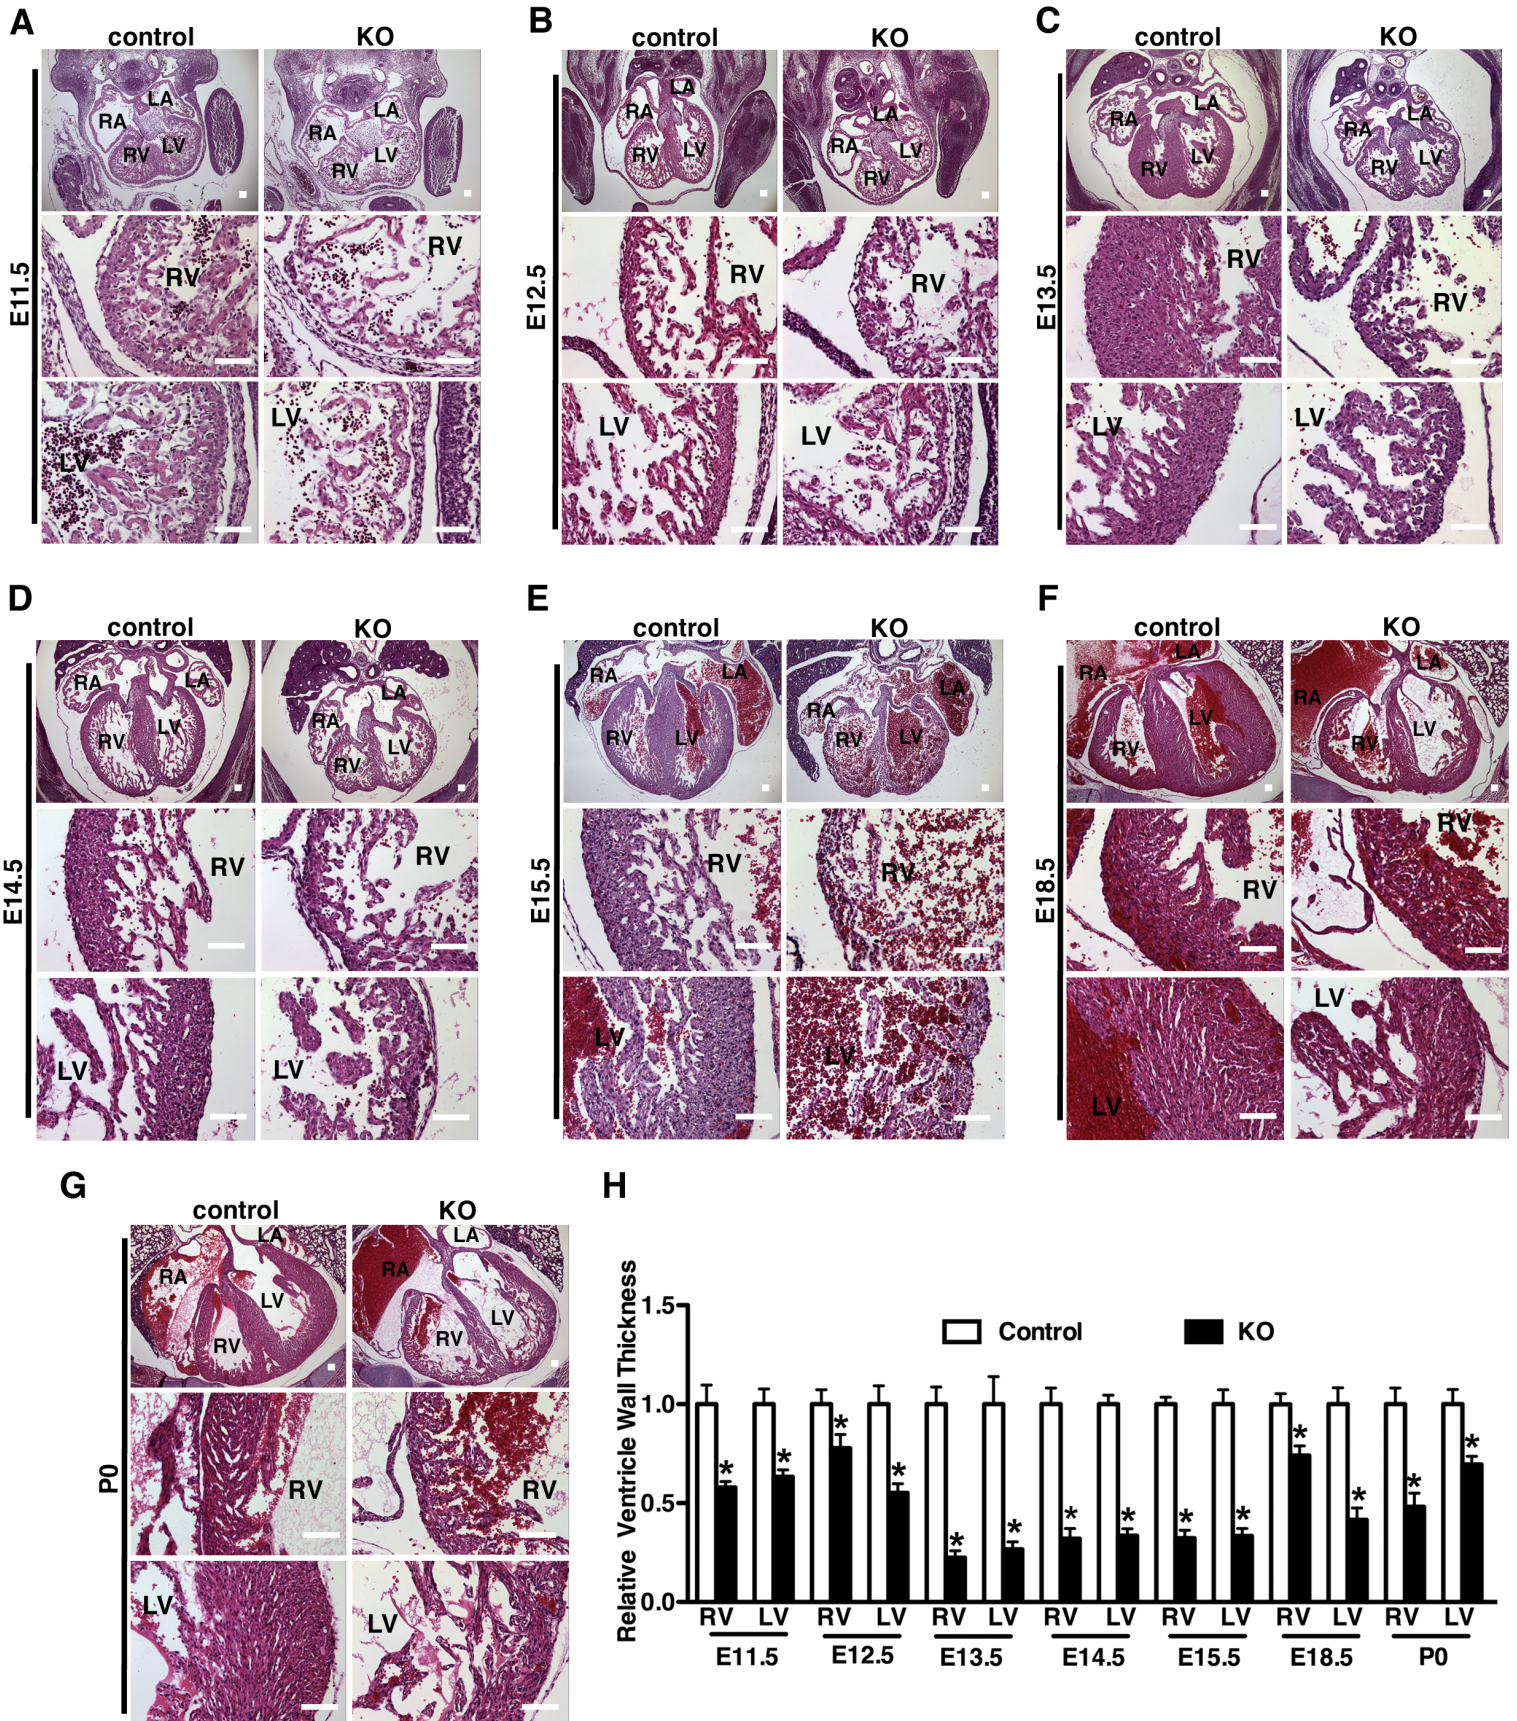

# Online Figure IV

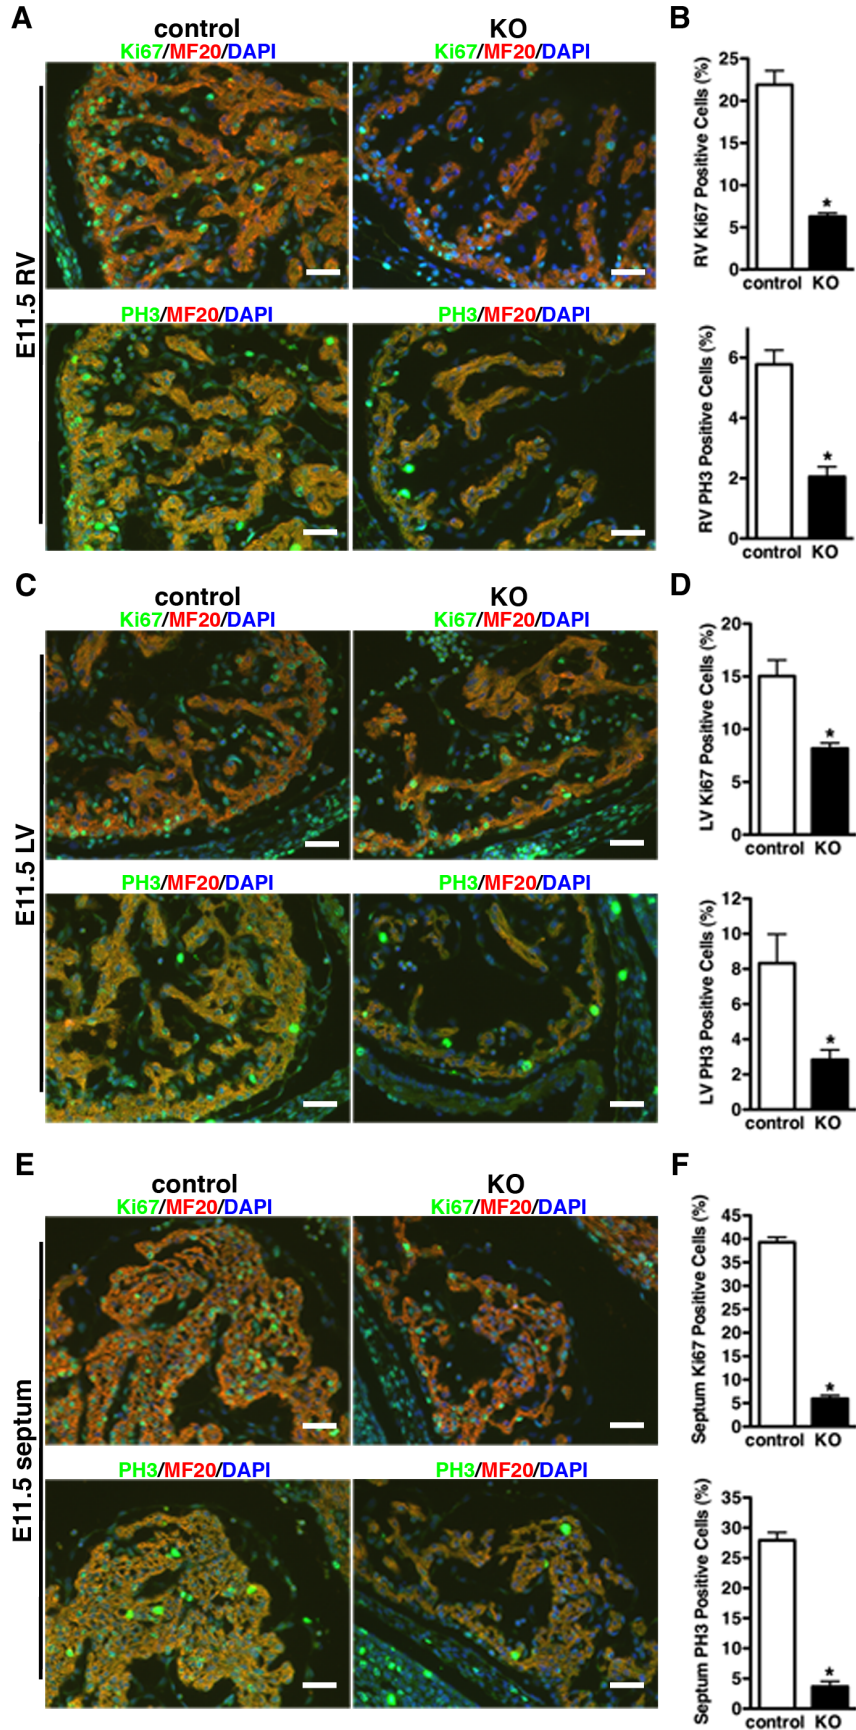

# Online Figure V

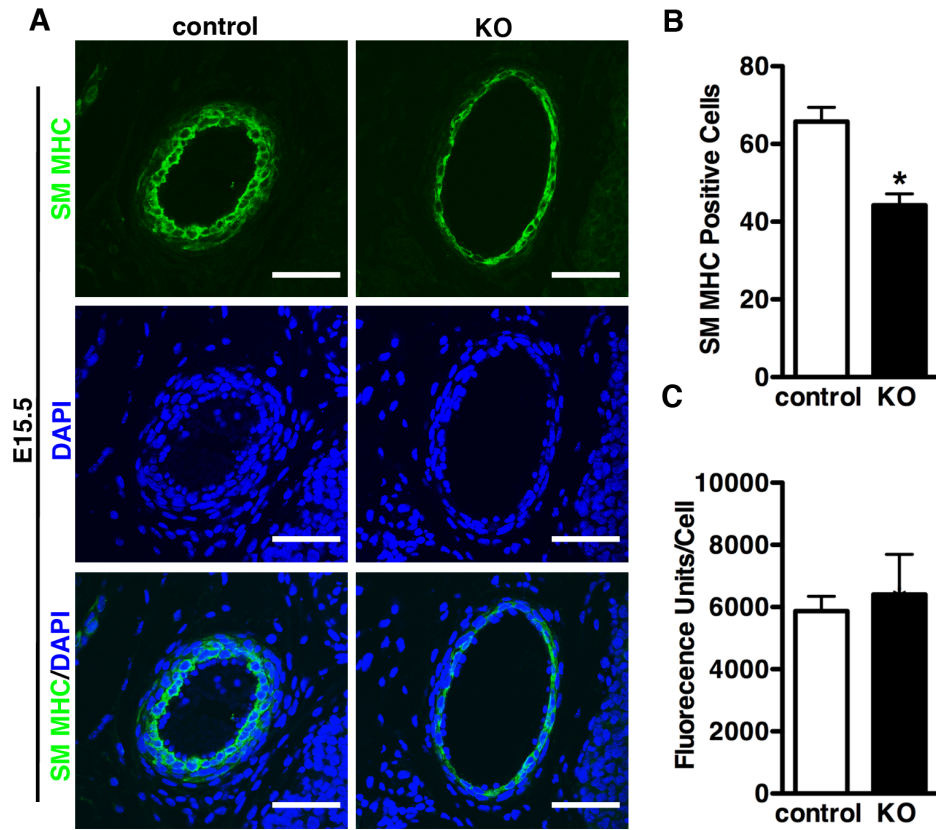



Online Figure VI

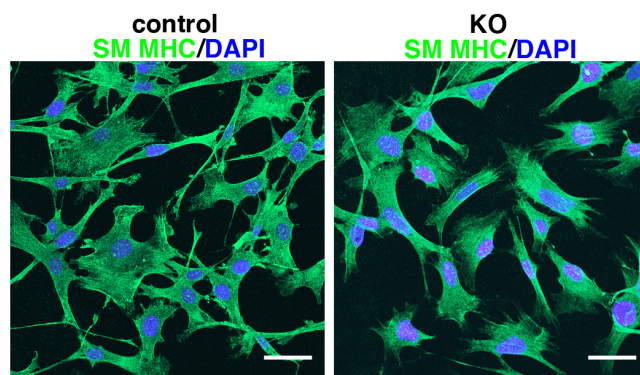

## Online Table I

Genotype distribution in cardiac/smooth muscle-specific YAP knock-out offspring from mating pair of SM22 $\alpha$ -Cre<sup>+</sup>/YAP<sup>F/W</sup> male X YAP<sup>F/F</sup> female mice.

| Genotype                                                      | E10.5 | E11.5 | E12.5 | E13.5 | E14.5 | E15.5 | E16.5 | E17.5-18.5 | P0 | P1-P14 |
|---------------------------------------------------------------|-------|-------|-------|-------|-------|-------|-------|------------|----|--------|
| SM22 $\alpha$ -Cre <sup>-</sup> /YAP <sup>F/W</sup>           | 6     | 7     | 8     | 11    | 9     | 10    | 24    | 21         | 30 | 35     |
| SM22 $\alpha$ -Cre <sup>-</sup> /YAP <sup>F/F</sup> (control) | 3     | 9     | 7     | 12    | 14    | 10    | 17    | 19         | 24 | 37     |
| SM22 $\alpha$ -Cre <sup>+</sup> /YAP <sup>F/W</sup>           | 3     | 9     | 10    | 13    | 20    | 18    | 15    | 21         | 30 | 34     |
| SM22 $\alpha$ -Cre <sup>+</sup> /YAP <sup>F/F</sup> (KO)      | 4     | 7     | 8     | 12    | 13    | 13    | 11    | 11         | 8  | 1*     |
| Total                                                         | 16    | 32    | 33    | 48    | 56    | 51    | 67    | 72         | 92 | 107    |
| KO ratio (%)                                                  | 25%   | 22%   | 24%   | 25%   | 23%   | 25%   | 16%   | 15%        | 9% | 1%     |

\* died on P21

# Online Table II

PCR array results using cDNA from E15.5 control and YAP KO dorsal aorta tissues.

| Symbol   | Well | AVG ΔC <sub>t</sub><br>(C <sub>t</sub> (GOI) - Ave Ct<br>(HKG)) |            | 2 <sup>-ΔC<sub>t</sub></sup> |            | Fold Change           | Fold Up- or Down-<br>Regulation |
|----------|------|-----------------------------------------------------------------|------------|------------------------------|------------|-----------------------|---------------------------------|
|          |      | YAP KO                                                          | WT Control | YAP KO                       | WT Control | YAP KO /WT<br>Control | YAP KO /WT<br>Control           |
| Abi1     | A01  | 3.88                                                            | 3.74       | 6.8E-02                      | 7.5E-02    | 0.91                  | -1.10                           |
| Atm      | A02  | 6.42                                                            | 6.53       | 1.2E-02                      | 1.1E-02    | 1.08                  | 1.08                            |
| Atr      | A03  | 5.10                                                            | 5.18       | 2.9E-02                      | 2.8E-02    | 1.06                  | 1.06                            |
| Aurka    | A04  | 4.48                                                            | 4.57       | 4.5E-02                      | 4.2E-02    | 1.07                  | 1.07                            |
| Aurkb    | A05  | 4.17                                                            | 4.15       | 5.6E-02                      | 5.6E-02    | 0.99                  | -1.01                           |
| Bcl2     | A06  | 4.26                                                            | 4.42       | 5.2E-02                      | 4.7E-02    | 1.12                  | 1.12                            |
| Birc5    | A07  | 3.42                                                            | 3.51       | 9.4E-02                      | 8.8E-02    | 1.07                  | 1.07                            |
| Braa1    | A08  | 4.56                                                            | 4.76       | 4.2E-02                      | 3.7E-02    | 1.15                  | 1.15                            |
| Braa2    | A09  | 5.27                                                            | 5.39       | 2.6E-02                      | 2.4E-02    | 1.09                  | 1.09                            |
| Casp3    | A10  | 4.19                                                            | 3.99       | 5.5E-02                      | 6.3E-02    | 0.87                  | -1.15                           |
| Ccna1    | A11  | 9.22                                                            | 9.89       | 1.7E-03                      | 1.1E-03    | 1.60                  | 1.60                            |
| Ccna2    | A12  | 2.32                                                            | 2.20       | 2.0E-01                      | 2.2E-01    | 0.92                  | -1.09                           |
| Ccnb1    | B01  | 3.28                                                            | 3.26       | 1.0E-01                      | 1.0E-01    | 0.99                  | -1.01                           |
| Ccnb2    | B02  | 3.41                                                            | 3.57       | 9.4E-02                      | 8.4E-02    | 1.11                  | 1.11                            |
| Ccnc     | B03  | 6.68                                                            | 6.89       | 9.7E-03                      | 8.4E-03    | 1.15                  | 1.15                            |
| Ccnd1    | B04  | 2.85                                                            | 2.25       | 1.4E-01                      | 2.1E-01    | 0.66                  | -1.51                           |
| Ccnd2    | B05  | 1.27                                                            | 1.17       | 4.2E-01                      | 4.5E-01    | 0.93                  | -1.07                           |
| Ccnd3    | B06  | 1.38                                                            | 1.48       | 3.8E-01                      | 3.6E-01    | 1.07                  | 1.07                            |
| Ccne1    | B07  | 4.70                                                            | 4.82       | 3.9E-02                      | 3.5E-02    | 1.09                  | 1.09                            |
| Ccnf     | B08  | 5.16                                                            | 5.35       | 2.8E-02                      | 2.4E-02    | 1.14                  | 1.14                            |
| Cdc20    | B09  | 4.64                                                            | 4.84       | 4.0E-02                      | 3.5E-02    | 1.15                  | 1.15                            |
| Cdc25a   | B10  | 5.06                                                            | 5.20       | 3.0E-02                      | 2.7E-02    | 1.10                  | 1.10                            |
| Cdc25c   | B11  | 5.98                                                            | 6.05       | 1.6E-02                      | 1.5E-02    | 1.05                  | 1.05                            |
| Cdc6     | B12  | 5.45                                                            | 5.53       | 2.3E-02                      | 2.2E-02    | 1.06                  | 1.06                            |
| Cdc7     | C01  | 6.49                                                            | 6.95       | 1.1E-02                      | 8.1E-03    | 1.38                  | 1.38                            |
| Cdk1     | C02  | 2.64                                                            | 2.71       | 1.6E-01                      | 1.5E-01    | 1.04                  | 1.04                            |
| Cdk2     | C03  | 3.10                                                            | 3.16       | 1.2E-01                      | 1.1E-01    | 1.05                  | 1.05                            |
| Cdk4     | C04  | 1.18                                                            | 1.22       | 4.4E-01                      | 4.3E-01    | 1.03                  | 1.03                            |
| Cdk5rap1 | C05  | 6.51                                                            | 6.81       | 1.1E-02                      | 8.9E-03    | 1.23                  | 1.23                            |
| Cdk6     | C06  | 3.25                                                            | 3.35       | 1.0E-01                      | 9.8E-02    | 1.07                  | 1.07                            |
| Cdkn1a   | C07  | 4.92                                                            | 5.32       | 3.3E-02                      | 2.5E-02    | 1.31                  | 1.31                            |
| Cdkn1b   | C08  | 2.39                                                            | 2.60       | 1.9E-01                      | 1.7E-01    | 1.16                  | 1.16                            |
| Cdkn2a   | C09  | 11.94                                                           | 12.58      | 2.5E-04                      | 1.6E-04    | 1.56                  | 1.56                            |
| Cdkn2b   | C10  | 9.04                                                            | 9.21       | 1.9E-03                      | 1.7E-03    | 1.13                  | 1.13                            |
| Cdkn3    | C11  | 5.31                                                            | 5.13       | 2.5E-02                      | 2.8E-02    | 0.88                  | -1.13                           |
| Chek1    | C12  | 4.57                                                            | 4.75       | 4.2E-02                      | 3.7E-02    | 1.14                  | 1.14                            |
| Chek2    | D01  | 5.57                                                            | 5.80       | 2.1E-02                      | 1.8E-02    | 1.17                  | 1.17                            |
| Cks1b    | D02  | 3.69                                                            | 3.94       | 7.8E-02                      | 6.5E-02    | 1.19                  | 1.19                            |
| Ddit3    | D03  | 4.57                                                            | 4.81       | 4.2E-02                      | 3.6E-02    | 1.19                  | 1.19                            |
| Dst      | D04  | 2.42                                                            | 2.46       | 1.9E-01                      | 1.8E-01    | 1.03                  | 1.03                            |
| E2f1     | D05  | 5.85                                                            | 6.05       | 1.7E-02                      | 1.5E-02    | 1.14                  | 1.14                            |
| E2f2     | D06  | 7.38                                                            | 7.75       | 6.0E-03                      | 4.6E-03    | 1.29                  | 1.29                            |
| E2f3     | D07  | 5.12                                                            | 5.09       | 2.9E-02                      | 2.9E-02    | 0.98                  | -1.02                           |
| E2f4     | D08  | 4.07                                                            | 4.24       | 6.0E-02                      | 5.3E-02    | 1.13                  | 1.13                            |
| Gadd45a  | D09  | 6.89                                                            | 7.38       | 8.4E-03                      | 6.0E-03    | 1.40                  | 1.40                            |
| Gpr132   | D10  | 11.40                                                           | 11.99      | 3.7E-04                      | 2.5E-04    | 1.51                  | 1.51                            |
| Hus1     | D11  | 7.66                                                            | 7.74       | 5.0E-03                      | 4.7E-03    | 1.06                  | 1.06                            |
| Itgb1    | D12  | 0.01                                                            | -0.14      | 9.9E-01                      | 1.1E+00    | 0.90                  | -1.11                           |
| Mad2l1   | E01  | 3.31                                                            | 3.24       | 1.0E-01                      | 1.1E-01    | 0.96                  | -1.05                           |
| Mcm2     | E02  | 3.51                                                            | 3.76       | 8.8E-02                      | 7.4E-02    | 1.19                  | 1.19                            |
| Mcm3     | E03  | 3.03                                                            | 3.04       | 1.2E-01                      | 1.2E-01    | 1.01                  | 1.01                            |
| Mcm4     | E04  | 3.22                                                            | 3.21       | 1.1E-01                      | 1.1E-01    | 0.99                  | -1.01                           |
| Mdm2     | E05  | 3.51                                                            | 3.75       | 8.8E-02                      | 7.4E-02    | 1.18                  | 1.18                            |
| Mki67    | E06  | 1.53                                                            | 1.67       | 3.5E-01                      | 3.1E-01    | 1.10                  | 1.10                            |
| Mre11a   | E07  | 4.99                                                            | 5.08       | 3.2E-02                      | 2.9E-02    | 1.07                  | 1.07                            |
| Msh2     | E08  | 5.17                                                            | 5.29       | 2.8E-02                      | 2.6E-02    | 1.08                  | 1.08                            |
| Myb      | E09  | 8.55                                                            | 9.07       | 2.7E-03                      | 1.9E-03    | 1.44                  | 1.44                            |
| Nbn      | E10  | 4.36                                                            | 4.32       | 4.9E-02                      | 5.0E-02    | 0.97                  | -1.03                           |
| Nek2     | E11  | 5.26                                                            | 5.44       | 2.6E-02                      | 2.3E-02    | 1.13                  | 1.13                            |
| Notch2   | E12  | 3.25                                                            | 3.21       | 1.1E-01                      | 1.1E-01    | 0.98                  | -1.03                           |
| Pkd1     | F01  | 2.99                                                            | 2.88       | 1.3E-01                      | 1.4E-01    | 0.92                  | -1.08                           |
| Pmp22    | F02  | 0.89                                                            | 1.10       | 5.4E-01                      | 4.6E-01    | 1.16                  | 1.16                            |
| Ppm1d    | F03  | 4.27                                                            | 4.40       | 5.2E-02                      | 4.7E-02    | 1.10                  | 1.10                            |
| Rad17    | F04  | 6.02                                                            | 6.06       | 1.5E-02                      | 1.5E-02    | 1.03                  | 1.03                            |
| Rad21    | F05  | 2.33                                                            | 2.37       | 2.0E-01                      | 1.9E-01    | 1.03                  | 1.03                            |
| Rad51    | F06  | 6.59                                                            | 6.90       | 1.0E-02                      | 8.4E-03    | 1.23                  | 1.23                            |
| Rad9     | F07  | 5.57                                                            | 5.58       | 2.1E-02                      | 2.1E-02    | 1.01                  | 1.01                            |
| Ran      | F08  | 6.32                                                            | 6.45       | 1.3E-02                      | 1.1E-02    | 1.09                  | 1.09                            |
| Rb1      | F09  | 4.55                                                            | 4.79       | 4.3E-02                      | 3.6E-02    | 1.19                  | 1.19                            |
| Rbl1     | F10  | 4.45                                                            | 4.53       | 4.6E-02                      | 4.3E-02    | 1.06                  | 1.06                            |
| Rbl2     | F11  | 4.90                                                            | 4.96       | 3.4E-02                      | 3.2E-02    | 1.05                  | 1.05                            |
| Sfn      | F12  | 8.17                                                            | 8.19       | 3.5E-03                      | 3.4E-03    | 1.01                  | 1.01                            |
| Shc1     | G01  | 2.55                                                            | 2.72       | 1.7E-01                      | 1.5E-01    | 1.12                  | 1.12                            |
| Skp2     | G02  | 4.08                                                            | 4.12       | 5.9E-02                      | 5.7E-02    | 1.03                  | 1.03                            |
| Sifn1    | G03  | 9.10                                                            | 10.21      | 1.8E-03                      | 8.5E-04    | 2.16                  | 2.16                            |
| Smc1a    | G04  | 2.38                                                            | 2.38       | 1.9E-01                      | 1.9E-01    | 1.00                  | 1.00                            |
| Stag1    | G05  | 3.64                                                            | 3.69       | 8.0E-02                      | 7.8E-02    | 1.03                  | 1.03                            |
| Stmn1    | G06  | 0.64                                                            | 0.52       | 6.4E-01                      | 7.0E-01    | 0.92                  | -1.09                           |
| Terf1    | G07  | 4.09                                                            | 4.31       | 5.9E-02                      | 5.0E-02    | 1.17                  | 1.17                            |
| Tfdp1    | G08  | 1.91                                                            | 1.93       | 2.7E-01                      | 2.6E-01    | 1.02                  | 1.02                            |
| Trp53    | G09  | 3.64                                                            | 3.87       | 8.0E-02                      | 6.8E-02    | 1.18                  | 1.18                            |
| Trp63    | G10  | 9.93                                                            | 10.86      | 1.0E-03                      | 5.4E-04    | 1.90                  | 1.90                            |
| Tsg101   | G11  | 3.11                                                            | 3.11       | 1.2E-01                      | 1.2E-01    | 1.00                  | -1.00                           |
| Wee1     | G12  | 4.53                                                            | 4.51       | 4.3E-02                      | 4.4E-02    | 0.99                  | -1.01                           |
| Actb     | H01  | -2.76                                                           | -2.93      | 6.8E+00                      | 7.6E+00    | 0.89                  | -1.13                           |
| B2m      | H02  | -0.04                                                           | 0.26       | 1.0E+00                      | 8.3E-01    | 1.23                  | 1.23                            |
| Gapdh    | H03  | -0.80                                                           | -1.04      | 1.7E+00                      | 2.1E+00    | 0.85                  | -1.18                           |
| Gusb     | H04  | 4.22                                                            | 4.35       | 5.4E-02                      | 4.9E-02    | 1.09                  | 1.09                            |
| Hsp90ab1 | H05  | -0.62                                                           | -0.63      | 1.5E+00                      | 1.5E+00    | 0.99                  | -1.01                           |
| MGDC     |      |                                                                 |            |                              |            |                       |                                 |
| RTC      |      |                                                                 |            |                              |            |                       |                                 |
| RTC      |      |                                                                 |            |                              |            |                       |                                 |
| PPC      |      |                                                                 |            |                              |            |                       |                                 |
| PPC      |      |                                                                 |            |                              |            |                       |                                 |
| PPC      |      |                                                                 |            |                              |            |                       |                                 |

**Online Table III. List of primer sequences used in the study.**

**A. Primers used for quantitative RT-PCR**

| <i>Gene Name</i>    | <i>Species</i> | <i>Sequence</i>                     |
|---------------------|----------------|-------------------------------------|
| Aurka <sup>1</sup>  | Mouse          | F: 5'-GGGTGGTCTGTGCATGCTCCG-3'      |
|                     | Mouse          | R: 5'-GCCTCAAAGGAGGCATCCCCACTA-3'   |
| Aurkb <sup>1</sup>  | Mouse          | F: 5'-ATGAGCAGCGGACTGCCACG-3'       |
|                     | Mouse          | R: 5'-GTCCAGGGTGCCGCACATGG-3'       |
| Ccna1               | Mouse          | F: 5'-ATCGCCCAGACAGAGAAGAA-3'       |
|                     | Mouse          | R: 5'-GCATTTGACAAGCATCAGGA-3'       |
| Ccnd1               | Mouse/rat      | F: 5'-GAACACTTCCTCTCCAAAATGCCAGA-3' |
|                     | Mouse/rat      | R: 5'-GAAATGAACTTCACATCTGTGGCAC-3'  |
| Foxm1               | Mouse          | F: 5'-GCCATGATACAGTTTGCCATC-3'      |
|                     | Mouse          | R: 5'-AGAGAAAGGTTGTGACGAATAGAG-3'   |
| Cdc25b <sup>1</sup> | Mouse          | F: 5'-TGGTGGCCCTGTTGACAGGC-3'       |
|                     | Mouse          | R: 5'-GCGGCACATCCGTGGTCCAC-3'       |
| Cdc2 <sup>1</sup>   | Mouse          | F: 5'-TTTCGGCCTTGCCAGAGCGTT-3'      |
|                     | Mouse          | R: 5'-GTGGAGTAGCGAGCCGAGCC-3'       |
| Cdc20 <sup>2</sup>  | Mouse          | F: 5'-GGCACATTCGCATTTGGAACG-3'      |
|                     | Mouse          | R: 5'-TAGTGGGGAGACCAGAGGATGGAG-3'   |
| Cdkn2a              | Mouse          | F: 5'-CTCACCTCGCTTGTACAGT-3'        |
|                     | Mouse          | R: 5'-GCACGAACTTCACCAAGAAA-3'       |
| HMGB2               | Mouse          | F: 5'-AAGAGCGACAAAGCTCGTTA-3'       |
|                     | Mouse          | R: 5'-ATCTTTGGCAGATTGCTCAG-3'       |
| Gadd45a             | Mouse          | F: 5'-CGTAGACCCCGATAACGTGGTA-3'     |
|                     | Mouse          | R: 5'-CGGATGAGGGTGAAATGGAT-3'       |
| Slfn1               | Mouse          | F: 5'-GCCAGACCAGCACCTGCAC-3'        |
|                     | Mouse          | R: 5'-AAGAGGTTGGAGGGGGCTCAT-3'      |
| Trp63               | Mouse          | F: 5'-CCACCATCTATCAGATTGAGCA-3'     |
|                     | Mouse          | R: 5'-GAGATGAGGAGGTGAGGAGAAG-3'     |
| Sfn                 | Mouse          | F: 5'-ATGAAGACATGGCAGCTTTC-3'       |
|                     | Mouse          | R: 5'-GCTCGGTCTCTACCTTCTCC-3'       |
|                     | Rat            | F: 5'-TGAGGTCAGAACCCACCAATGCAAC-3'  |
|                     | Rat            | R: 5'-TGCTCTCCTCGTAGGACAACGTGTG-3'  |
| Gpr132              | Mouse          | F: 5'-TCGGCAAGAAGTGTCAGAATCCA-3'    |
|                     | Mouse          | R: 5'-TAAACCTAGCTTCGCTGGCTGTGA-3'   |

**B. Primers used for cloning of mouse Gpr132 promoter luciferase reporter and adenovirus**

| <i>Primer Name</i>   | <i>Sequence</i>                                         |
|----------------------|---------------------------------------------------------|
| Gpr132 luci          | F (KpnI): 5'-AGGTACCGTCCTTATACTCGTGTGACAAGCACT-3'       |
|                      | R (XhoI): 5'-ACTCGAGGCTCTTGAATCCCTACACTATAATGTG-3'      |
| Gpr132 MCAT mutation | F: 5'-AGTGACGTGCTAAGGTCATGGTACCAGATGTGTTGCCCTTTGTCC-3'  |
|                      | R: 5'-GGACAAAGGGCAACACATCTGGTACCATGACCTTAGCACGTCACCT-3' |
| Gpr132 adenovirus    | F (KpnI): 5'-AGGTACCATGAGATCAGAACCTACCAATGCAGCA-3'      |
|                      | R (HindIII): 5'-GAAGCTTTTAGCAGAGCTCCTCAGGCAGTCTCT-3'    |

### C. Primers for quantitative ChIP assay

| <i>Primer Name</i> | <i>Sequence</i>                                                             |
|--------------------|-----------------------------------------------------------------------------|
| Gpr132 MCAT Region | F: 5'-CAGGTAGACGAGGACATCCAGGGAT-3'<br>R: 5'-CCTTTAGCACGCTGAACGCCATCAG-3'    |
| Gpr132 E3          | F: 5'-ACAGGCTGTACACGGTCTCTACAGTGTT-3'<br>R: 5'-TTCCACCCCGTGTGGATCCTGCACA-3' |

Note: the primer sequences are from the following studies:

1. von Gise A, Lin Z, Schlegelmilch K, Honor LB, Pan GM, Buck JN, Ma Q, Ishiwata T, Zhou B, Camargo FD, Pu WT. Yap1, the nuclear target of hippo signaling, stimulates heart growth through cardiomyocyte proliferation but not hypertrophy. *Proc Natl Acad Sci U S A*. 2012;109:2394-2399
2. Heallen T, Zhang M, Wang J, Bonilla-Claudio M, Klysik E, Johnson RL, Martin JF. Hippo pathway inhibits wnt signaling to restrain cardiomyocyte proliferation and heart size. *Science*. 2011;332:458-461
